# Supplementary material for: The role of intermolecular hydrogen bond on dielectric properties in hydrogen-bonded material 5-bromo-9-hydroxyphenalenone: theoretical investigation
Source: Royal Society of Chemistry journal article supplement (doi:10.1039/c1cp20264b), 2011-01-01
Supplement: c1cp20264b.pdf [file c1cp20264b.pdf]

**Supplementary Material for**

**The Role of Intermolecular Hydrogen Bond**  
**on Dielectric Properties in Hydrogen-Bonded Material**  
**5-Bromo-9-hydroxyphenalenone: Theoretical Investigation**

Hiroki Otaki\* and Koji Ando

*Department of Chemistry, Graduate School of Science,*

*Kyoto University, Sakyo-ku, Kyoto 606-8502, Japan*

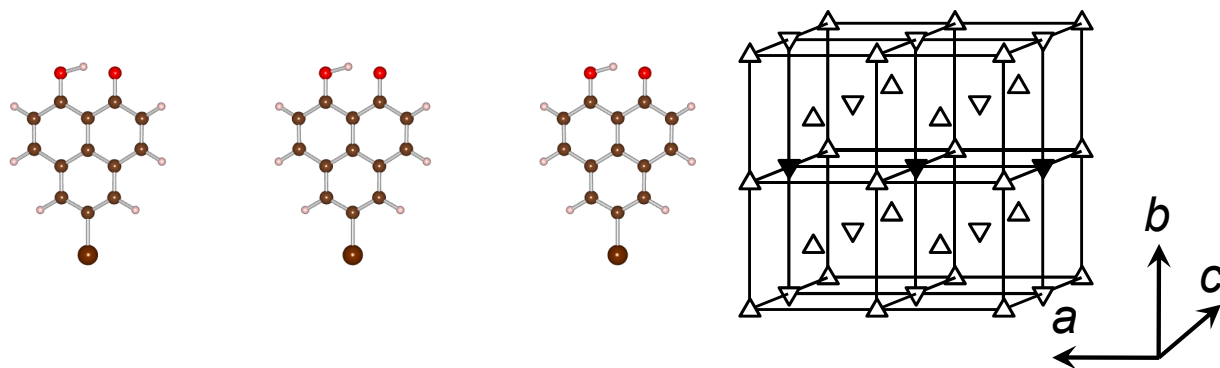

FIG. S1. Schematic structure of trimer A and its position in the crystal. Each triangle indicates a BrH-PLN molecule and inverted triangle represents an inverted one. The three solid triangles correspond to the components of the trimer.

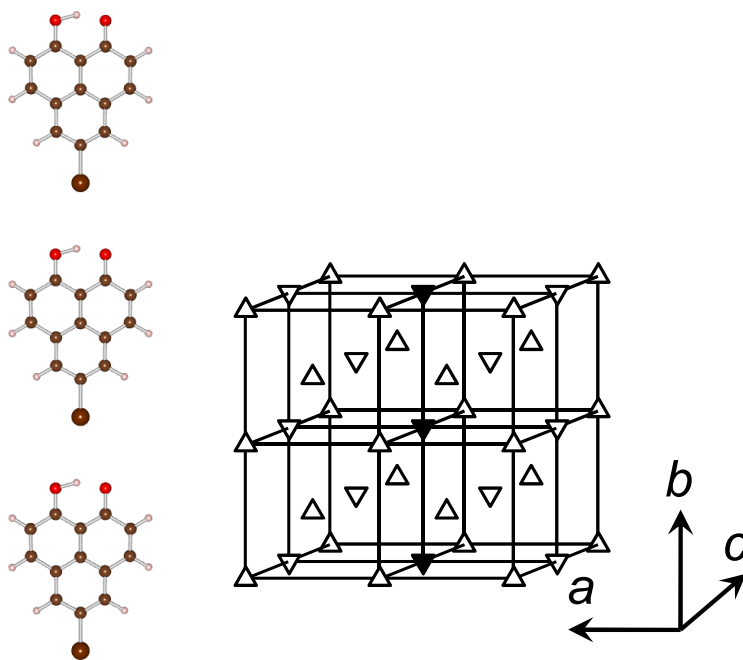

FIG. S2. Same as Fig. S1, but for trimer B.

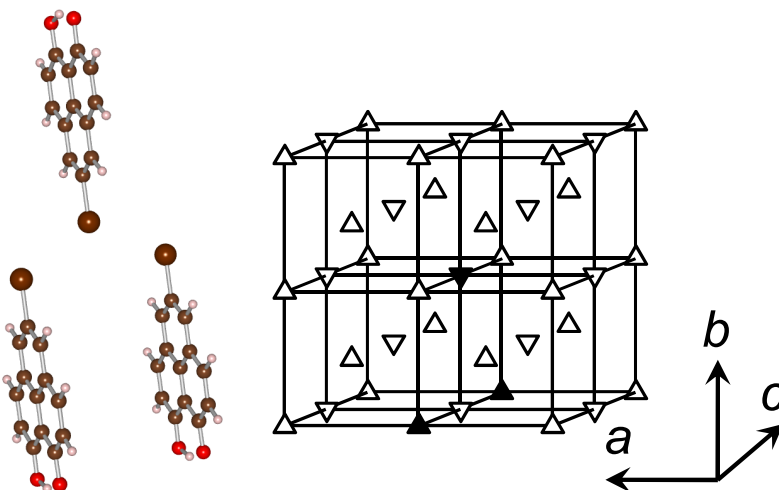

FIG. S3. Same as Fig. S1, but for trimer C.

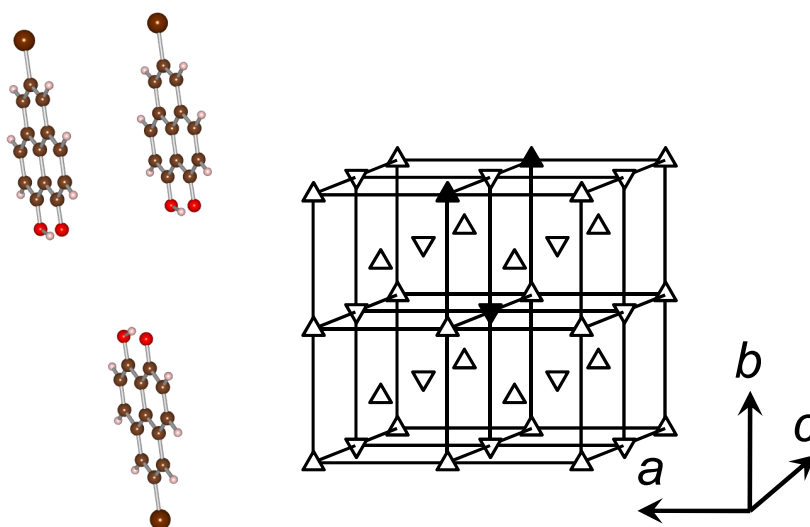

FIG. S4. Same as Fig. S1, but for trimer D.

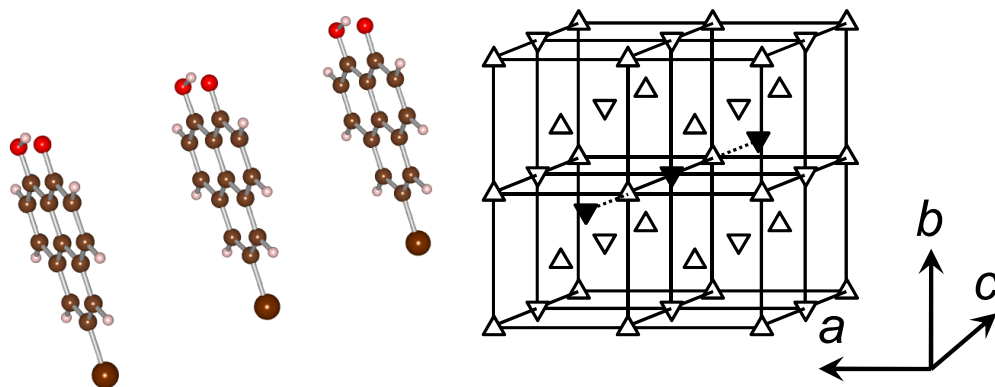

FIG. S5. Same as Fig. S1, but for trimer E.

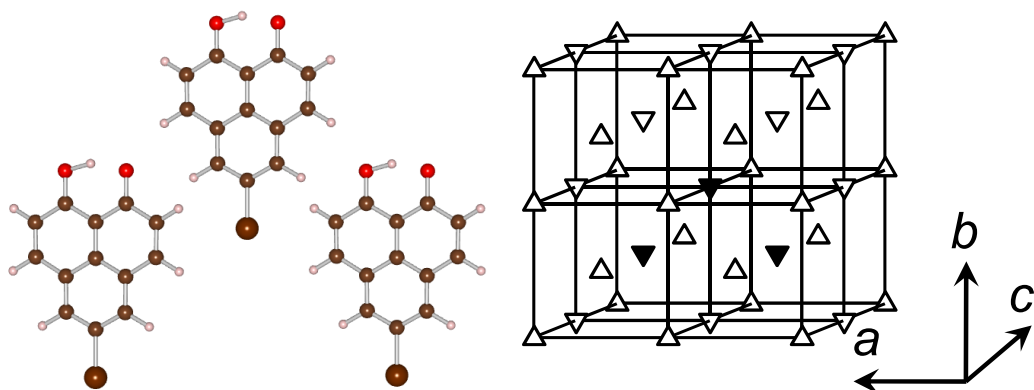

FIG. S6. Same as Fig. S1, but for trimer F.

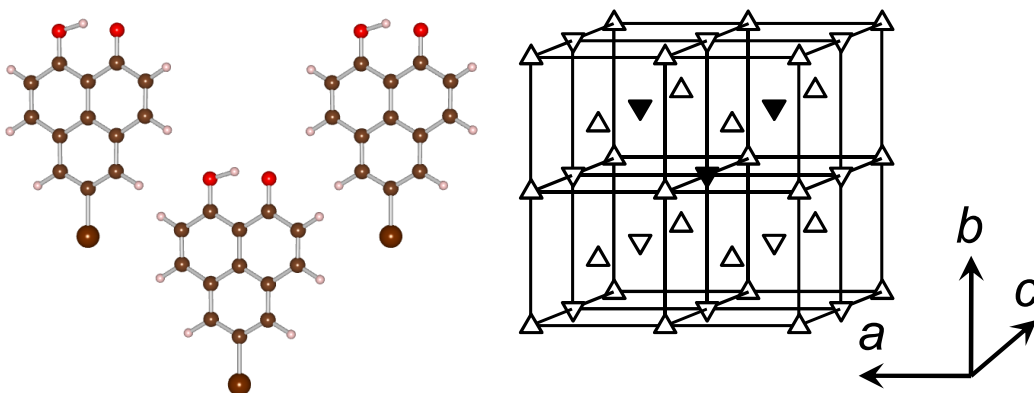

FIG. S7. Same as Fig. S1, but for trimer G.

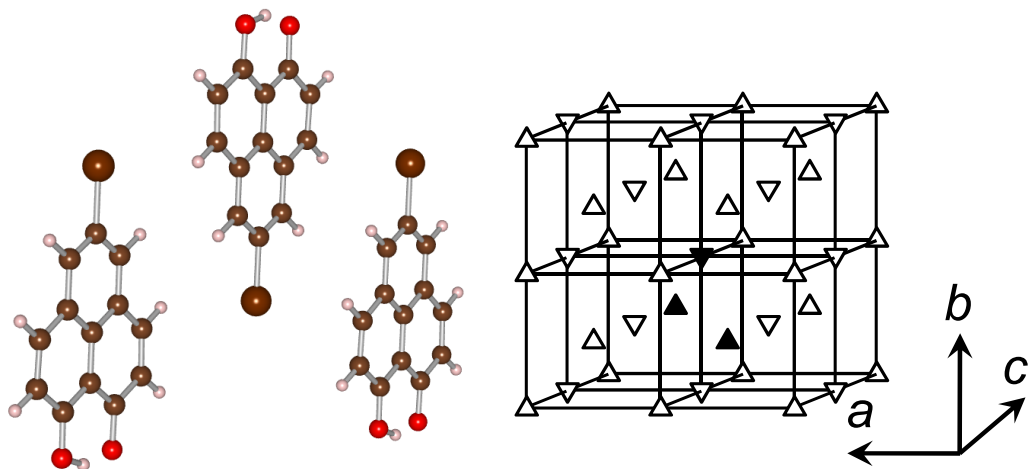

FIG. S8. Same as Fig. S1, but for trimer H.

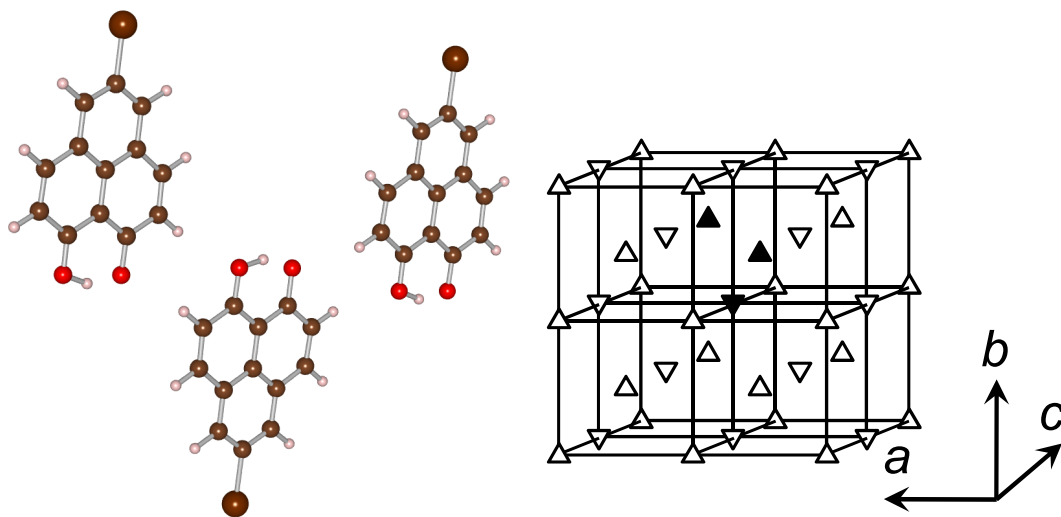

FIG. S9. Same as Fig. S1, but for trimer I.

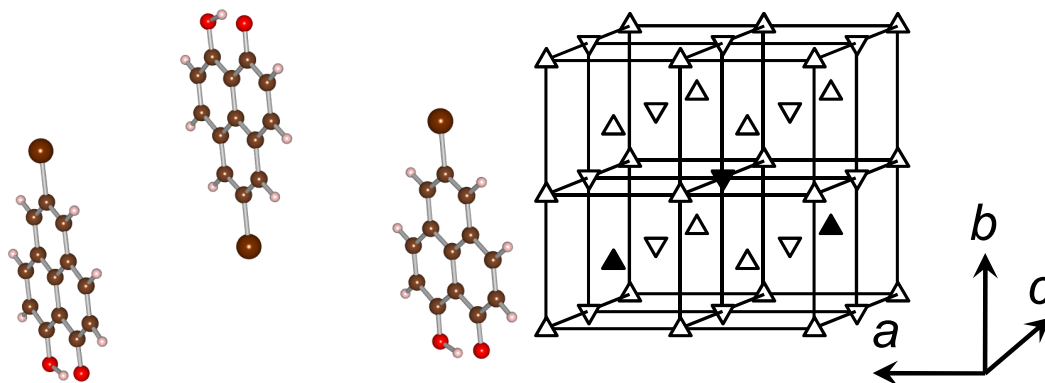

FIG. S10. Same as Fig. S1, but for trimer J.

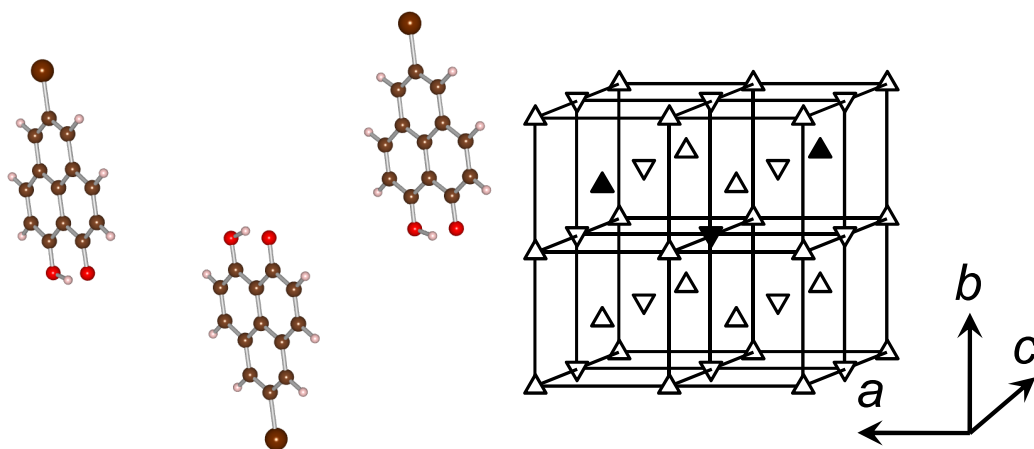

FIG. S11. Same as Fig. S1, but for trimer K.

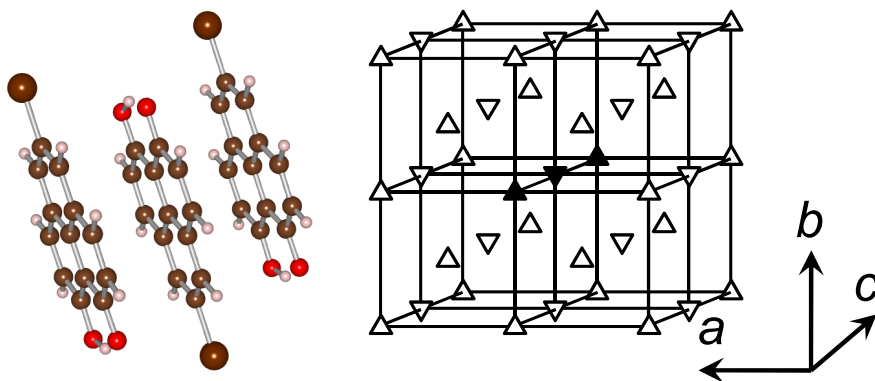

FIG. S12. Same as Fig. S1, but for trimer L.

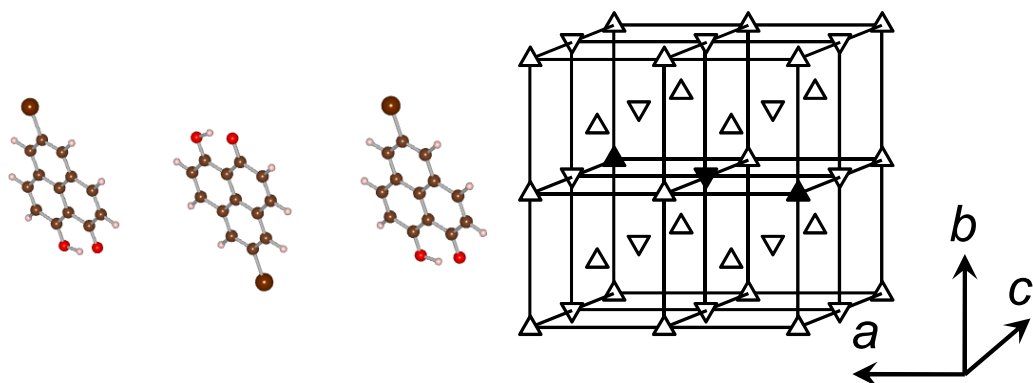

FIG. S13. Same as Fig. S1, but for trimer M.

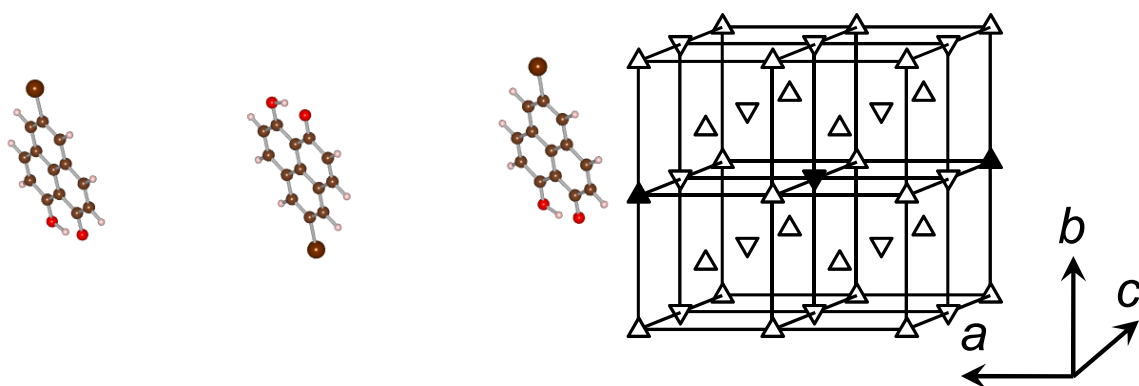

FIG. S14. Same as Fig. S1, but for trimer N.

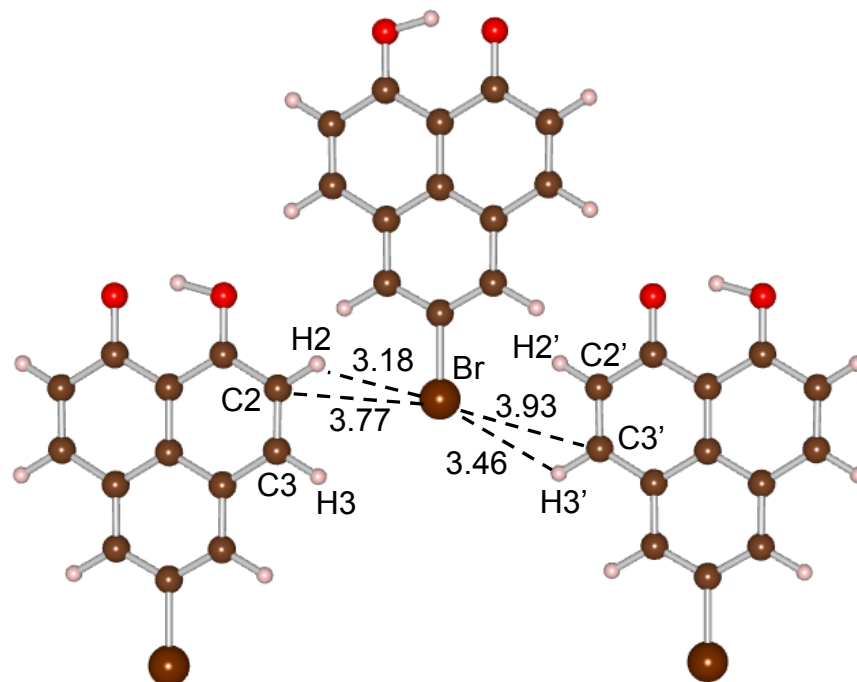

FIG. S15. Schematic structure of trimer F. The values in the figure denote the distances between atoms (in Å). Labels for atoms are given for Table S1.

TABLE S1. NPA charges for an isolated monomer and the central molecule of trimer F. The charges of the atoms around the Br atom of the central molecule are shown

| Atom | HF/3-21G(d,p) |         | HF/6-31G(d,p) |         |
|------|---------------|---------|---------------|---------|
|      | Isolated      | Central | Isolated      | Central |
| Br   | 0.078         | 0.056   | 0.062         | 0.037   |
| H2'  | 0.249         | 0.251   | 0.254         | 0.255   |
| C2'  | -0.323        | -0.334  | -0.317        | -0.330  |
| H3'  | 0.236         | 0.239   | 0.242         | 0.246   |
| C3'  | -0.109        | -0.099  | -0.112        | -0.100  |
| H2   | 0.249         | 0.253   | 0.254         | 0.256   |
| C2   | -0.334        | -0.342  | -0.327        | -0.336  |
| H3   | 0.238         | 0.241   | 0.244         | 0.249   |
| C3   | -0.095        | -0.087  | -0.099        | -0.090  |
